# Supplementary material for: Effect of the BOPPPS-RCDP in Basic Life Support Training for Newly Graduated Registered Nurses: A Mixed-Methods Study
Source: Research Square preprint supplement (doi:10.21203/rs.3.rs-6467343/v1), 2025-06-17

Ethics Committee of Guangdong Provincial Hospital of Chinese Medicine

## Ethics Committee of Guangdong Provincial Hospital of Chinese Medicine

Decision of Exemption from Review

### Decision of Exemption from Review

Note: The Ethics Committee reserves the right to decide on the exemption from review. For research that meets the exemption criteria, the Ethics Committee also reserves the right to review it if necessary.

Project Acceptance Number: YM2023-295

Project Title: Design and Practice of Basic Life Support Teaching for Resident Nurses Based on Modular Teaching

Sponsor/Task Assigning Unit: Emergency Department of Guangdong Provincial Hospital of Chinese Medicine

Clinical Research Unit: Guangdong Provincial Hospital of Traditional Chinese Medicine (Main Hospital Emergency Department)

Principal Investigators: Wu Shirong, Deng Qiuying

Ethics Committee Exemption Review Decision:

According to the ethical principles of the "Good Clinical Practice for Drug Trials" issued by the National Medical Products Administration, the "Guidelines for Ethical Review of Drug Clinical Trials" issued by the Health and Family Planning Commission, the "Measures for Ethical Review of Biomedical Research Involving Humans" issued by the National Administration of Traditional Chinese Medicine, as well as the "Declaration of Helsinki" by the World Medical Association and the "International Ethical Guidelines for Health-related Research Involving Humans" by the Council for International Organizations of Medical Sciences, this Ethics Committee has reviewed the exemption application for the project "Design and Practice of Basic Life Support Teaching for Resident Nurses Based on Modular Teaching" and considers that the project meets the requirements for exemption from ethical review, and agrees to exempt the project from review.

The Ethics Committee reserves the right to re-review this project if necessary.

Chair/Vice Chair Signature:

Date: August 16, 2023

广东省中医院伦理委员会 (盖章)

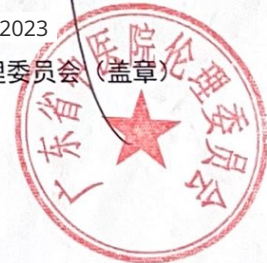

Supplement: Supplementary file 1 [file 348ccb0474dd608f7ec88aed.pdf]
