# Supplementary material for: Effect of the BOPPPS-RCDP in Basic Life Support Training for Newly Graduated Registered Nurses: A Mixed-Methods Study
Source: Research Square preprint supplement (doi:10.21203/rs.3.rs-6467343/v1), 2025-06-17
Supplement: Supplementary file 1 [file 1324d2440b6367b017c5f0ae.docx]

Supplement Material: Subjective score sheet

Criteria for Scoring Adult Basic Life Support (BLS) Operation

| Name |  | Gender： |  | | Date： |  | |
| --- | --- | --- | --- | --- | --- | --- | --- |
| Content | Operation requirement | | | | | Points | Score |
| 1. Assessing the environment  (4 points) | Check your surroundings and confirm they're safe. | | | | | 1 |  |
| Take personal protection | | | | | 1 |  |
| Look at the clock | | | | | 1 |  |
| Recorded rescue time | | | | | 1 |  |
| 2. Judging consciousness  (3 points) | Tap the patient on both shoulders and call each ear | | | | | 2 |  |
| The judgment time is 3-5 seconds | | | | | 1 |  |
| 3. Judging respiratory and pulse  (8 points) | Position the patient in a straight line | | | | | 1 |  |
| Open the patient's clothes | | | | | 1 |  |
| Get the position right | | | | | 1 |  |
| Judging breath | | | | | 2 |  |
| Judging pulse | | | | | 2 |  |
| The judgment time is 5-10 seconds | | | | | 1 |  |
| 4 . Start the EMS  (9 points) | Call assistant | | | | | 3 |  |
| Assistant prepares balloon mask | | | | | 3 |  |
| Assistant prepares the defibrillator | | | | | 3 |  |
| 5. Chest compressions  (40 points) | Complete 23 out of 30 presses accurately in 15-18 seconds. (more than 75%) | Press position (1 point deduction for each mistake) | | | | 5 |  |
| Press posture (1 point deduction for each mistake) | | | | 5 |  |
| Objective score: %  (press pass rate * 20) | | Frequency  (100-120 times/min) | | 20 |  |
| Depth（>5cm） | |
| Fully recoiled chest | |
| Compression-breathing ratio 30:2  (1 point deduction for each mistake) | | | | 5 |  |
| 6. Electrical defibrillation  (14 points) | Report: "AED has arrived" | | | | | 1 |  |
| Quickly turn on the AED power switch and verify that the indicator light and display device are normal | | | | | 2 |  |
| Check the defibrillation electrode sheet and select the appropriate electrode sheet | | | | | 2 |  |
| The medical electrodes were attached to the patient's upper right chest and lower left chest. | | | | | 4 |  |
| Insert the electrode strip into the device and wait for the machine to analyze heart rhythm. | | | | | 2 |  |
| Make sure no one around the patient comes into contact with them before discharge. Yell "People leave!" | | | | | 2 |  |
| Press the orange button | | | | | 1 |  |

| Content | Operation requirement | | | Points | Score |
| --- | --- | --- | --- | --- | --- |
| 7. Balloon ventilation  (18 points) | Pressing the forehead and lifting the chin | | | 2 |  |
| Check the mouth for foreign objects | | | 2 |  |
| A total of 10 times of ventilation, 7 times of correct combination (more than 70%) | E-C maneuver | | 2 |  |
| Balloon ventilation method | | 2 |  |
| Objective rating: %  Ventilation pass rate * Total score | duration of ventilation | 10 |  |
| The thorax is clearly undulating |
| 8. Examination and evaluation (4 points) | Heart and breathing restored. CPR successful | | | 2 |  |
| Put the patient in a resuscitation position | | | 1 |  |
| Arrange the patient's clothes and prepare for transport | | | 1 |  |

Signature by group Advisor: Date:
