# Supplementary material for: Effect of the BOPPPS-RCDP in Basic Life Support Training for Newly Graduated Registered Nurses: A Mixed-Methods Study
Source: Research Square preprint supplement (doi:10.21203/rs.3.rs-6467343/v1), 2025-06-17
Supplement: Supplementary file 2 [file 96a203a8884ba02c631166d0.docx]

**Supplement material: General Information Questionnaire**

1 Age

18~25

26~35

＞35

2 Gender

Male

Female

3 Educational level

College degree

Bachelor degree

Master's degree

4 Height

5 BMI

Underweight

Normal weigh

Overweight

6 CPR training in the past year

No

Yes

7 Previous experience with Chest Compression on real patient

No

Yes

8 Whether to obtain the basic life support BLS certificate

No

Yes
