# Supplementary material for: Effect of the BOPPPS-RCDP in Basic Life Support Training for Newly Graduated Registered Nurses: A Mixed-Methods Study
Source: Research Square preprint supplement (doi:10.21203/rs.3.rs-6467343/v1), 2025-06-17
Supplement: Supplementary file 3 [file c2da96798425f32ccde32661.docx]

# Teaching satisfaction questionnaire

| Dimension | Item | Very much dissatisfied | Not very satisfied | Generally satisfactory | Quite satisfied | Very satisfied |
| --- | --- | --- | --- | --- | --- | --- |
| Teaching method | I think the class time arrangement is reasonable |  |  |  |  |  |
| I am full of interest in the teaching links of this teaching mode |  |  |  |  |  |
| I am willing to actively participate in teaching activities |  |  |  |  |  |
| I think the evaluation method of this teaching mode is reasonable |  |  |  |  |  |
| Teaching effect | I think this teaching mode can mobilize students ' enthusiasm and active classroom atmosphere |  |  |  |  |  |
| I think this teaching mode can improve the learning efficiency |  |  |  |  |  |
| I think this teaching model can strengthen the brain 's memory of the cardiopulmonary resuscitation process after the training |  |  |  |  |  |
| I think this teaching mode can help me to be more skilled in clinical application of cardiopulmonary resuscitation skills |  |  |  |  |  |
| The feeling of learning | I don 't think this teaching mode adds extra teaching burden |  |  |  |  |  |
| I hope to continue to use this teaching mode in future teaching activities |  |  |  |  |  |
